# Supplementary material for: Anti-ENO1 antibody combined with metformin against tumor resistance: a novel antibody-based platform
Source: PeerJ. 2024 Mar 18;12:e16817. doi: 10.7717/peerj.16817 (PMC10956521; doi:10.7717/peerj.16817)
Supplement: Supplemental Information 9 [file peerj-12-16817-s009.xlsx]

## Sheet: Sheet1
Figure 2 flow cytometry
PAMC82	ALDH+(%)
CON	1.62	2.81	3.75
DDP	21.7	27.3	28.2
A549	ALDH+(%)
CON	4.15	7.36	6.25
CTX	11.8	9.9	11.46
PAMC82	CD44+(%)
CON	0.036	0.048	0.057
DDP	14.6	16.8	19.7
A549	CD44+(%)
CON	46.2	45.1	43.9
CTX	44	39.4	45.6
Supplementary Figure S6 flow cytometry
PAMC82	CON	DDP	MET	DDP+MET	Anti-ENO1	DDP+anti-ENO1
ALDH+(%)	1.59	25.8	8.14	5.6	16.2	12.6
	2.64	27.1	8.98	6.04	11	11.2
	3.54	19.3	8.37	5.5	15.9	8.2
A549	CON	CTX	MET	CTX+MET	Anti-ENO1	CTX+anti-ENO1
ALDH+(%)	5.7	11.4	2.58	1.92	13.2	4.11
	6.32	9.2	6.14	1.64	18.7	5.43
	7.21	13.6	3.98	2.26	15.6	4.58
PAMC82	CON	DDP	MET	DDP+MET	Anti-ENO1	DDP+anti-ENO1
CD44+(%)	0.031	20.5	19.5	16.5	5.19	3.14
	0.042	15.2	20.5	17.1	4.45	2.45
	0.064	18.3	19.2	18.2	5.86	4.54
A549	CON	CTX	MET	CTX+MET	Anti-ENO1	CTX+anti-ENO1
CD44+(%)	42.8	45.1	42.6	44.4	38.5	34.5
	40.7	41.4	51.4	50.6	24.6	26.2
	43.9	42.3	52.3	48.5	36.1	32.1
Supplementary Figure S7 flow cytometry
PAMC82	CON	DDP	MET	Anti-ENO1	DDP+MET+anti-ENO1
ALDH+(%)	1.76	26.8	8.25	16.9	4.24
	2.76	28.8	9.06	11.3	2.36
	3.72	20.6	8.63	14.8	3.83
A549	CON	CTX	MET	Anti-ENO1	CTX+MET+anti-ENO1
ALDH+(%)	5.24	13.4	3.08	12.9	1.29
	6.83	15.3	6.42	17.5	1.67
	6.78	8.46	5.54	16.4	1.31
PAMC82	CON	DDP	MET	Anti-ENO1	DDP+MET+anti-ENO1
CD44+(%)	0.038	21.2	18.5	5.78	1.86
	0.043	17.1	19	6.18	2.85
	0.061	16.5	17.4	4.66	2.36
A549	CON	CTX	MET	Anti-ENO1	CTX+MET+anti-ENO1
CD44+(%)	44.8	42.1	43.4	26.6	9.8
	39.5	43.2	50.6	35.9	16.7
	42.8	41.5	53.2	39.2	10.4
